# New method for high-throughput measurements of viscosity in submicrometer-sized membrane systems

Grzegorz Chwastek,<sup>[a]±</sup> Eugene P. Petrov,<sup>[b]±</sup> and James Peter Sáenz<sup>\*[c]</sup>

**Abstract:** In order to unravel the underlying principles of membrane adaptation in small systems like bacterial cells, robust approaches to characterize membrane fluidity are needed. Currently available relevant methods require advanced instrumentation and are not suitable for high throughput settings needed to elucidate the biochemical pathways involved in adaptation. We developed a fast, robust, and financially accessible quantitative method to measure microviscosity of lipid membranes in bulk suspension using a commercially available plate reader. Our approach, which is suitable for high-throughput screening, is based on the simultaneous measurements of absorbance and fluorescence emission of a viscosity-sensitive fluorescent dye DCVJ incorporated into a lipid membrane. We validated our method using artificial membranes with various lipid compositions over a range of temperatures and observed values that were in good agreement with previously published results. Using our approach, we were able to detect a lipid phase transition in the ruminant pathogen *Mycoplasma mycoides*.

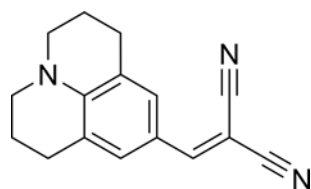

**Figure 1.** Chemical structure of 9-(2,2-dicyanovinyl)julolidine (DCVJ).

Viscosity is a crucial physical property of living membranes that is tightly regulated though homeostatic adaptation to environmental and physiological challenges (Sinensky 1974; Nakayama et al. 1984; Avery et al. 1995; van de Vossenberg et al. 1999; Kaye & Baross 2004; Wang et al. 2009; Mouritsen 1987). Measuring viscosity is important for investigating the mechanisms involved in membrane adaptation and to constrain the range of membrane properties that can support life. In particular, studying relatively simple bacterial model organisms

can provide insight into fundamental principles underlying membrane homeostasis and adaptivity. Presently, however, there are no high throughput or broadly accessible methods to measure viscosity in bacterial cells or submicron scale synthetic membrane systems.

Currently existing methods for measuring membrane viscosity are relatively low throughput or require specialized instrumentation not available to many laboratories. Fluorescence correlation spectroscopy (FCS) (Petrov and Schuille 2008) (Weidemann, Mücksch, and Schuille 2014) can provide estimates of diffusivity of a molecular probe. FCS, however, requires a relatively specialized microscopy setup, and measuring diffusion in submicrometer scale membrane systems can be particularly challenging. Similarly, fluorescence recovery after photobleaching is not feasible on small vesicles or bacteria because of resolution limitations (Wachsmuth 2014). Recently, there have been a number of promising studies measuring viscosity utilizing the fluorescence lifetime of viscosity-sensitive fluorescent probes. While this approach could be applied to submicron membrane systems, the technology is fairly expensive, and high throughput instrumentation is currently not commercially available.

In this study, we developed a method to estimate membrane viscosity by measuring the relative brightness of a viscosity-sensitive fluorescence dye using a simple plate reader capable of simultaneously measuring absorbance and fluorescence emission. Our method is based on the empirical finding of Förster and Hoffmann (Forster and Hoffmann 1971) that certain fluorescence probes undergoing twisted intramolecular charge transfer (TICT) show a power-law dependence of their brightness (fluorescence quantum yield,  $\phi$ ) on the viscosity  $\eta$  of bulk solvents  $\phi \propto \eta^p$ . This relation holds in cases where the non-radiative decay rate is controlled by the viscosity of the medium, as long as the non-radiative decay rate is much higher than rate of radiative decay rate. In that case one can use this effect to monitor the microviscosity via either fluorescence quantum yield (Du et al. 2014; Haidekker et al. 2005; Loutfy and Arnold 1982) or by the excited-state lifetime (Levitt et al. 2011; Wu et al. 2013).

Among others, 9-(2,2-dicyanovinyl)julolidine (DCVJ) is a well characterized TICT probe with the fluorescence emission in the visible range of the light spectrum (Loutfy and Law 1980). It was shown that DCVJ can be used to estimate the viscosity in lipid membranes using the relative quantum yield approach (Loutfy and Arnold 1982). Moreover, the dye is commercially available at a very accessible price making it a perfect candidate for application in large-scale screening assays.

[a] Dr. G. Chwastek  
B CUBE, Technische Universität Dresden  
Tatzberg 41, 01307 Dresden, Germany  
E-mail: grzegorz.chwastek@tu-dresden.de

[b] Dr. E.P. Petrov  
Faculty of Physics, Ludwig Maximilian University of Munich,  
Geschwister-Scholl-Platz 1, 80539 Munich, Germany  
E-mail: eugene.p.petrov@gmail.com

[c] Dr. J.P. Sáenz\*  
B CUBE, Technische Universität Dresden  
Tatzberg 41, 01307 Dresden, Germany  
E-mail: james.saenz@tu-dresden.de

± authors equally contributed to the work

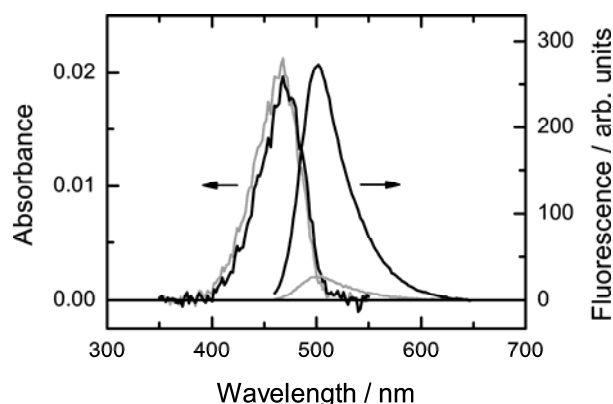

**Figure 2.** Absorbance and fluorescence emission spectra of DCVJ in glycerol and ethylene glycol at 18 °C. At the same dye concentration, absorbance spectra are virtually identical. In contrast, fluorescence emission depends strongly on the viscosity of the solvent, and under the same experimental conditions, a substantial increase in the fluorescence intensity is seen in more viscous glycerol.

In order to estimate membrane viscosity, we compared the relative brightness of DCVJ incorporated into liposomes with the brightness of DCVJ measured in solvents of known viscosities. To this end, we developed an experimental protocol that overcomes the limitations of the analytical noise of the plate reader and artifacts related to the sample structure and construction of the multi-well plate. To validate our method, we measured the relative brightness of DCVJ in liposomes composed of several well-characterized lipid species and lipid mixtures at the physiological range of temperatures. We showed that the viscosity activation energies obtained using our method agree within experimental error with those reported in the literature. Using our approach, we report values for membrane viscosity in liposomes made of several different lipid species and provide a first estimate of the membrane viscosity of the ruminant pathogen *Mycoplasma mycoides*. The method we report provides an affordable and fast means to measure the viscosity of membranes and could be used in screening settings where, e.g., a large number of bacterial strains or mutants could be studied.

## Results and Discussion

### 1. Establishing a plate reader assay for measuring variations in membrane viscosity

We aimed at establishing a method that would allow for accurate measurements of the membrane viscosity in lipid vesicles. To this end, we made use of the power-law dependence of the

fluorescence quantum yield of DCVJ on the viscosity of its microenvironment. As the measurement of the quantum yield is problematic in our experimental setting, we replace it by the fluorescence brightness denoted here as  $R$  and defined as the ratio of integrated fluorescence DCVJ emission and the absorbance of the probe in the sample (for details, see Experimental Section). To calibrate our method, we measured the brightness  $R$  of DCVJ in viscous solvents — glycerol and ethylene glycol — over a range of temperatures and across a series of mixtures at a fixed temperature, which allowed us to cover a wide range of viscosities (Figure 2). As expected,  $R$  shows a power-law dependence on the viscosity with the exponent  $p = 0.53 \pm 0.01$  falling into range of values (0.51-0.59) reported previously (Haidekker et al. 2005). This power-law correspondence allows us to convert the measured brightness of the DCVJ fluorescence into the viscosity of its microenvironment (for details, see Experimental Section). It is important to emphasize that the fluorescence quantum yield — and hence fluorescence brightness  $R$  — of a molecular rotor reflects the rotational mobility of the dicyanovinyl moiety of the molecule. As a result, the method reports the viscosity of the microenvironment of the probe, which will be referred in what follows as microviscosity. In contrast, the methods based on translational diffusion of relatively large membrane inclusions like proteins, colloidal particles, or membrane domains, give information on the surface viscosity of the lipid bilayer (Saffman and Delbrück 1975; Hughes, Pailthorpe, and White 1981; Petrov and Schwille 2008), which, with the use of the bilayer thickness, can be converted into an estimate of the bulk viscosity of the membrane material. In contrast, methods based on measuring translational diffusion of fluorescent lipid analogs or fluorescently labeled lipids, which are too small to warrant the hydrodynamics-based description of their motion, do not allow one to obtain valid estimates of membrane viscosity.

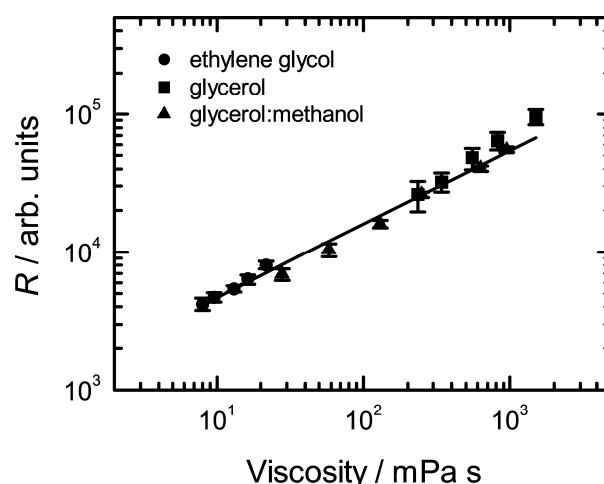

**Figure 3.** Relative brightness of DCVJ in solvents of different viscosity. Viscosity of glycerol and ethylene glycol was varied by changing the temperature. Mixtures of glycerol and methanol at various ratios were measured at constant temperature (22 °C). The line shows the power law fit.

First, we tested the fluorescence response of DCVJ to temperature in membranes comprised of DOPC which is an unsaturated phospholipid with a melting temperature below  $-20^{\circ}\text{C}$ . Thus, under our experimental conditions it is in the fluid state far from the lipid melting phase transition. The DOPC viscosity estimated from the DCVJ fluorescence brightness for the temperature range used in our experiment could be very well described by the Arrhenius law (Figure 3) with the activation energy of  $54 \pm 9$  kJ/mol, which agrees with previous findings based on measurements of the fluorescence lifetime of a molecular rotor (Table 1). The previously reported absolute values of the viscosity are in the range of 13 to 74 mPa-s and are of the same order of magnitude as reported by Kung and Reed for the DPPC membrane in a liquid phase (Kung and Reed 1986). While it is clear that methods reporting microviscosity are relative, it is still valuable to estimate the scale of discrepancy between the relevant methods. When compared to membrane studies involving the lateral diffusion of membrane inclusions fulfilling the requirements of the hydrodynamic model for membrane diffusion (Saffman and Delbrück 1975; Hughes, Pailthorpe, and White 1981; Petrov and Schuille 2008), our results are roughly a factor of 3 lower (128 mPa-s at  $24^{\circ}\text{C}$  vs  $41 \pm 10$  mPa-s at  $25^{\circ}\text{C}$  in our case). On the other hand, Wu et al. using an approach based on the microviscosity dependence of the fluorescence lifetime of a molecular rotor reported 228 mPa-s for DOPC membrane at  $25^{\circ}\text{C}$ . Hence, it is clear that discrepancies of a factor of 2 to 6 are common for such measurements and show the specificity of the approach rather than its drawbacks.

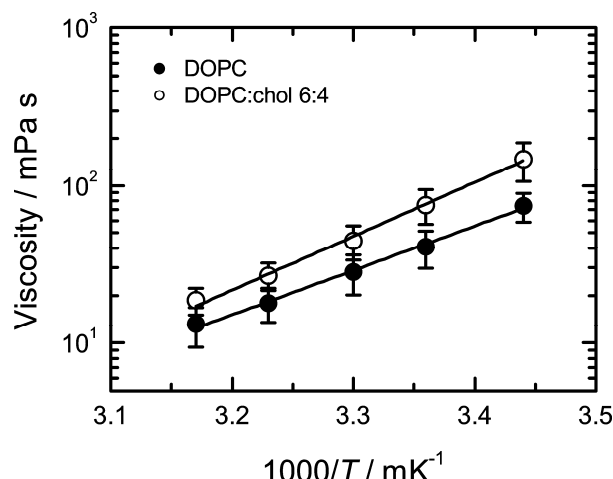

**Figure 4.** Viscosity of lipid membrane composed of DOPC and DOPC:cholesterol 6:4 (mol:mol). Viscosity data are shown with a fit using the Arrhenius law (---). The activation energies were  $54 \pm 9$  and  $63 \pm 8$  kJ/mol for pure and cholesterol doped DOPC membrane.

## 2. Influence of cholesterol on viscosity of phospholipid membranes

Living organisms use cholesterol to control and adapt their membranes to constantly changing environmental conditions.

Therefore, a robust assay to estimate the influence of cholesterol on membrane properties is crucial. To test the sensitivity of our method to cholesterol content, we measured the viscosity of DOPC membrane supplemented with 40 mol% of cholesterol. (Figure 4). Cholesterol introduced a substantial increase in the viscosity at all temperatures (Figure 4A). The estimated activation energy for viscosity is  $63 \pm 8$  kJ/mol, roughly 17 % higher than that for the pure DOPC membrane. Our value is thus close to that of Petrov and Schuille (Petrov and Schuille 2008) who analyzed results of Cicuta et al. (Cicuta, Keller, and Veatch 2007) for the liquid disordered ( $L_d$ ) phase of DOPC/DPPC/cholesterol ternary mixture, for which the activation energy was estimated to be 77 kJ/mol. A similar increase in the activation energy (18 %) upon addition of the same amount of cholesterol was found by Filippov et al. using an NMR-based approach (Filippov, Oradd, and Lindblom 2003); here, however, it is important to point out that the activation energies were reported not for membrane viscosity, but rather for the diffusion coefficient of a deuterated lipid in the membrane, which could potentially explain the difference in the results. Based on fluorescence lifetime measurements of a molecular rotor, Wu et al. (Wu et al. 2013) have studied the lipid mixture, and, while the activation energy of the viscosity was not reported, they found a relatively moderate increase (16 %) in the absolute viscosity. In contrast, we observed an 85 % increase in the membrane viscosity upon addition of cholesterol for the same temperature. A similar trend in viscosity was observed in experiments involving translational diffusion of membrane inclusions that fulfil the requirements of the hydrodynamic model: based on the published results on the surface membrane viscosity obtained there, we calculated the bulk membrane viscosity for DOPC (140 mPa-s,  $24^{\circ}\text{C}$ ) (Herold, Schuille, and Petrov 2010) and cholesterol-enriched  $L_d$  phase of DOPC (270 mPa-s,  $25^{\circ}\text{C}$ ) (Petrov and Schuille 2008) assuming the membrane thickness to be 3.7 nm (Ding et al. 2015). The viscosity difference between pure lipid and cholesterol-doped bilayer comprises 70 % and is reasonably close to our results. Therefore, we argue that the sensitivity of our approach to cholesterol is similar to that of studies based on translational diffusion of membrane inclusions and thus correctly reflects the viscous properties of the membrane material.

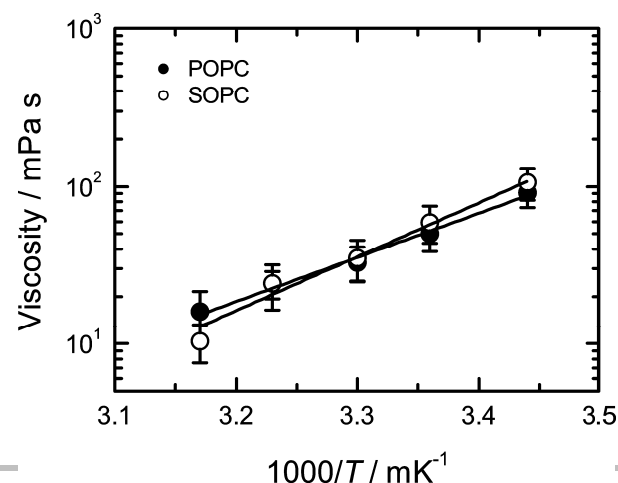

**Figure 5.** Membrane viscosity variation in response to lipid saturation. Viscosity data are shown along with a fit by the Arrhenius dependence (—). The activation energies of the membrane viscosity are  $52 \pm 13$ ,  $54 \pm 9$  and  $68 \pm 8$  kJ/mol for DLPC, DOPC and SOPC liposomes, respectively.

### 3. Sensitivity to variation in phospholipid acyl chain saturation and length.

Besides cholesterol, the physical properties of biological membranes can be regulated by the length and saturation of phospholipid acyl chains. We therefore evaluated the effect of the acyl chain composition on membrane microviscosity as sensed by DCVJ fluorescence.

We first addressed the variation in saturation using lipid vesicles comprised of DLPC (2x C18:2), DOPC (2x C18:1), and SOPC (C18:0, C18:1).

The average membrane viscosity for all compositions is similar within the experimental errors showing that within the analytical error of the method we cannot successfully resolve such subtle differences in viscosity (Figure 5). The estimated activation energies of the viscosity for DLPC, DOPC, and SOPC ( $52 \pm 13$ ,  $54 \pm 9$ , and  $68 \pm 8$  kJ/mol, respectively) show the expected trend  $DLPC < DOPC < SOPC$ , although the differences between the activation energies of DLPC and DOPC viscosities are not significant. On other hand, SOPC shows a relatively high activation energy of  $68 \pm 8$  kJ/mol which is close to the value of the DOPC:cholesterol 6:4 mixture.

For chain length variation, we studied membranes comprised of phospholipids containing acyl chains with one double bond either 18 or 16 carbons long: SOPC (18:0, 18:1) and POPC (16:0, 18:1). We find that variations in acyl chain structure do not result in statistically significant changes in either the viscosity values (Figure 6) nor in the viscosity activation energies ( $53 \pm 10$  and  $68 \pm 8$  kJ/mol for POPC and SOPC, respectively).

Taken together, our results demonstrate that the microviscosities of lipid membranes as reported by DCVJ fluorescence, do not show a pronounced dependence on either the length or saturation of acyl chains.

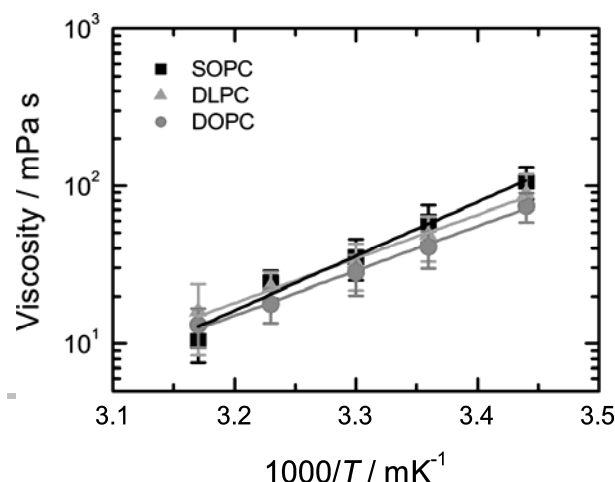

**Figure 6.** Viscosity of SOPC and POPC lipid membrane (symbols) along with their fits using the Arrhenius law (lines). Activation energies are  $53 \pm 10$  and  $68 \pm 8$  kJ/mol for POPC and SOPC vesicles, respectively.

### 4. Measuring viscosity in biologically relevant membranes

To test the applicability of our approach to biological membranes, we measured the temperature dependence of the viscosity of membranes purified from *Mycoplasma mycoides*, one of the simplest living organisms (Razin 1993) (Figure 7A). It has been previously shown that at temperatures above the growth conditions the lipid membrane of microorganisms is in  $L_d$  state (Lindblom et al. 2002; Linden et al. 1973). At temperatures lower than the growth temperature, the membranes of microorganisms are known to undergo a phase transition to a state characterized by a considerably higher viscosity (Sinensky 1974; Nakayama et al. 1984; Avery et al. 1995; van de Vossenberg et al. 1999; Kaye & Baross 2004; Wang et al. 2009; Mouritsen 1987), including a microorganism closely related to *M. mycoides* (Davis et al. 1980). Therefore, one should expect this effect to take place also for membranes of *M. mycoides*. It would be instrumental, therefore, to compare measurements on the *M. mycoides* membranes with two reference lipid mixtures that can model the expected behavior of the bacterial membrane above and below the growth temperature.

In order to model the behavior of the membrane at the growth temperature and above, we used the POPC:cholesterol 1:1 lipid mixture, which constitutes vast majority of the native membrane of *Mycoplasma* (Rottem 1980). This mixture is known to be in the  $L_d$  state within the range of temperatures of our study (Filippov et al. 2003). In contrast, a lipid mixture consisting of DPPC:cholesterol 1:1 that has been shown to be in a more viscous  $L_o$  state within the temperature range of our experiments (Wang et al. 2016) was used as a reference for the more viscous membrane state that the bacterial membrane should be expected below the growth temperature.

Comparison of the results for viscosity of *M. mycoides* membranes with those for the artificial lipid mixtures shows that indeed, at temperatures of 37 and 42 °C which are equal or above the growth conditions, bacterial membranes have a very similar viscosity and its temperature dependence to that of the  $L_d$  state artificial lipid mixture. At the same time, for the temperatures of 18 and 25 °C which are below the growth temperature, the viscosity of the bacterial membrane approaches the values of the lipid mixture in the  $L_o$  phase. Remarkably, the activation energy at the lower end of the temperature range is approximately the same as for the  $L_d$  phase at the temperatures. At the same time, a substantial increase in the viscosity activation energy is expected if a transition to the gel phase takes place (Kung and Reed 1986). This observation suggests that indeed, in agreement with our expectations, the lipid membrane of *M. mycoides* exists in the

fluid (liquid-disordered) state at and above the growth temperature, and transforms into a more viscous (liquid-ordered) phase characterized by a higher lipid order at temperatures about 10 degrees below the growth temperature. It also agrees well with the results of Linden et al. showing that cell membranes isolated from *E. coli* exhibit liquid-liquid phase separation upon cooling below the cell growth temperature (Linden et al. 1973).

According to the concept of homeoviscous adaptation put forward by Sinensky in 1974 (Sinensky 1974) the temperature of the phase transition from the fluid phase characteristic of the functional membrane to the more viscous phase-coexistence state should follow the growth temperature of bacteria. This has indeed been previously shown for a large number of microorganisms (Sinensky 1974; Nakayama et al. 1984; Avery et al. 1995; van de Vossenberg et al. 1999; Kaye & Baross 2004; Wang et al. 2009; Mouritsen 1987). Our measurements for membranes of *M. mycoides* grown at two different temperatures, 30 and 37 °C indeed show the expected trend: the transition from the low-viscosity fluid state to the high viscosity phase-separated state is shifted in accordance with the growth temperature.

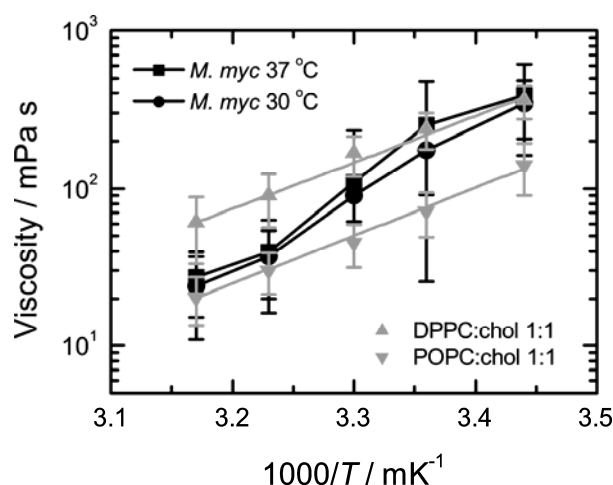

**Figure 7.** Influence of temperature on viscosity of native lipid membranes from *M. mycoides* grown at 30 and 37 °C (n=5). For comparison, viscosities (symbols) of  $L_d$  (POPC:cholesterol 1:1) and  $L_o$  (DPPC:cholesterol 1:1) membranes are plotted with corresponding fit of the Arrhenius law (dotted lines).

## Conclusions

In this work, we showed that using an experimental arrangement based on a standard plate reader capable of simultaneously measuring weak absorbance and relative changes of weak fluorescence signals one can obtain reliable estimates of the lipid membrane viscosity in submicrometer-sized liposomes using a TICT dye – DCVJ. In addition to absolute values of viscosity, we were able to reproducibly measure viscosity activation energies for membranes composed of several

different lipid species and their mixtures. We also show that these measurements are compatible with bacterial membranes, and could detect liquid-liquid phase transition in minimal membrane model organism *Mycobacterium mycoides*. Application of a multi-well plate reader would allow one to apply the method to high-throughput bacterial membrane phenotype screening.

## Experimental Section

### Chemicals and Materials

1,2-dioleoyl-*sn*-glycero-3-phosphocholine (dioleoylphosphatidylcholine; DOPC), 1-stearoyl-2-oleoyl-*sn*-glycero-3-phosphocholine (SOPC), 1-palmitoyl-2-oleoyl-glycero-3-phosphocholine (POPC), 1,2-dilinoleoyl-*sn*-glycero-3-phosphocholine (DLPC), and cholesterol were all purchased from Avanti Polar Lipids (Alabaster, AL, USA) and used without further purification. 9-(2,2-dicyanovinyl)julolidine (DCVJ), sodium chloride and 4-(2-hydroxyethyl)piperazine-1-ethanesulfonic acid sodium salt, N-(2-hydroxyethyl)piperazine-N'-(2-ethanesulfonic acid) sodium salt (HEPES), and anhydrous dimethyl sulfoxide (DMSO) were all obtained from Sigma (St. Louis, MO, USA). Glycerol (spectroscopic grade) and ethylene glycol (spectroscopic grade) were purchased at Alfa Aesar (Ward Hill, MA, USA). For all experiments MilliQ water with resistivity of 18.2 MΩ·cm (25 °C) and TOC below 5 ppb was used. An extruder for liposome preparation was purchased from Avanti Polar Lipids (Alabaster, AL, USA). Whatman® Nuclepore polycarbonate filters with pore size of 100 nm were purchased from GE Healthcare (Chicago, IL, USA). Black 96-well plates with transparent bottom (lumox®) were purchased from Sarstedt (Nümbrecht, Germany).

### Liposome preparation

Lipids were pipetted in the form of stock solutions in chloroform (25 mg/mL) into a glass vial, and a thin lipid film was formed on the vial inner surface under the stream of dry nitrogen. Subsequently, the lipid films were kept in vacuum overnight to remove traces of the organic solvent. To form vesicles, the vials containing the lipid films were filled with 10 mM HEPES buffer with 150 mM NaCl at pH 7 and incubated at least 20 °C above the lipid melting temperature for 30 min. Samples were then subjected to 10 cycles of freezing and thawing procedure which was followed by extrusion through a polycarbonate filter with 100-nm pores (10 cycles). By this means, suspensions of lipid vesicles with the total lipid concentration of 1 mM were formed. Directly before measurements, the vesicle suspensions were diluted to 0.2 mM lipid concentration and DCVJ from a stock solution in DMSO (400 μM) was added to the final concentration of 50 nM resulting in the 400:1 lipid-to-dye ratio. Samples were then incubated for 30 min at 45 °C and 500 rpm using ThermoMixer® (Eppendorf, Wesseling/Berzdorf, Germany). After incubation, the samples were pipetted into the 96-well plate in the amount of 200 μL per well.

### Preparation of bacterial membranes



*Mycoplasma mycoides* GM12 were grown on SP4 media at 30 and 37 °C and supplemented with Foetal Bovine Serum as a lipid source. Cells were harvested at mid-exponential phase and washed twice in buffer (HEPES 25 mM, NaCl 200 mM, Glucose 1%, pH 7). Washed cells were lysed on an Emulsiflex by passing three times at 4 bar pressure. The cell lysate was centrifuged at 4000 rpm for 10 minutes to remove non-lysed cells. The lysate was then loaded onto a sucrose step gradient (10%, 30%, 50% w/v) and spun overnight at 4 °C on a Beckman Ti45 rotor at 250,000 x g. A membrane fraction was collected at the 30%/50% interface. To remove excess sucrose, the membrane fraction was resuspended in 1.5 mL buffer and pelleted at 70,000 x g for 1 hour. The cell membrane fraction was then resuspended in buffer and stored at -80 °C until analysis.

#### Measurement protocol

All spectroscopical measurements were carried out using a SPARK 20M plate reader (Tecan, Grödig, Austria) equipped with a thermostat capable of maintaining the temperature of the sample in the range of 18 -42 °C with the accuracy of  $\pm 1$  °C. The temperature-dependent measurements were carried out at five sample temperatures: 42, 37, 30, 25, and 18 °C starting with 42 °C and subsequently cooling down the sample in steps. Upon reaching a specified temperature, the sample was first incubated for five minutes at 150 rpm using internal sample holder to ensure thermal equilibrium, after which absorption and fluorescence spectra were measured. To reduce evaporation of the samples, the multiwell plate was covered with a lid that was automatically taken off for absorbance measurements and replaced after their completion. At each temperature step, absorption spectra were recorded for each of the wells, after which fluorescence emission spectra from the same wells were collected. Absorbance was measured within the spectral range of 350-550 nm in 2-nm steps with the spectral slit width set to 3.5 nm. Fluorescence emission was measured in the 'bottom reading mode' of the setup in the epi-configuration using a 50/50 mirror. Fluorescence excitation and emission wavelengths were selected using the monochromators with the spectral slit widths set to 7.5 nm. Fluorescence was excited at 440 nm using a xenon flash lamp as an excitation source, and the emission spectra were measured in the range of 460-650 nm in 2-nm steps.

#### Solution viscosities

Viscosities of glycerol and ethylene glycol at 18, 25, 30, 37, and 42 °C were measured using a Kinexus ultra+ rotational rheometer (Malvern Panalytical, Malvern, Worcestershire, UK) using the cone-plate geometry (1° cone angle, diameter 60 mm) and a temperature stability better than  $\pm 0.1$  °C. The relative accuracy of the viscosity values was estimated to be better than 3%. Viscosities of glycerol-methanol mixtures were taken from ref. (Levitt et al. 2009).

#### Data analysis

Raw data from the plate reader were automatically saved for subsequent processing. For further analysis data were imported into RStudio using home-written script in R language. The ratiometric method described in the present paper requires accurate measurements of the absorption and fluorescence emission of the fluorescent label bound to liposomes. Working at low concentrations typical for the experiments reported here requires that special care should be taken during the analysis of the measured absorbance and fluorescence emission data. Because of the low total concentration of the dye in the volume of the sample (liposome suspension), prior to analysis, the recorded raw spectroscopic data need

to be corrected for artefacts in order to extract the pure absorption and fluorescence spectra.

#### Absorption spectra

Absorption spectra of DCVJ-labelled liposomes (Fig. 8) consist of the absorbance spectrum of the dye sitting on top of the smooth background sloping down toward longer wavelengths that originates from light scattering by the vesicles in suspension. In our measurement geometry which is based on the use of a multi-well plate, the light beam propagates in the vertical direction and passes through the free liquid-air interface. As a result, the absorption spectrum was found to be additionally affected by the presence of the meniscus. To account for the above-mentioned artefacts, we perform absorbance correction as follows. First, the absorption spectrum of a blank sample containing the same amount of pure buffer was subtracted from the raw absorption spectrum of the sample. This step compensates for the meniscus effect. After this step, the resulting spectrum represents the DCVJ absorption spectrum sitting on top of the smooth background due to light scattering by liposomes. The absorption spectrum of the DCVJ dye represents a well-defined bell-shaped curve, which allowed us to separate the absorption and scattering contributions. In order to do that, the absorption spectrum was recorded within the spectral range wider than the absorption spectrum of DCVJ, and the outermost portions of the measured absorption spectrum were together fitted by a power law dependence,

$$A_s(\lambda) = a_0 \lambda^{-m}$$

which is known to be a proper phenomenological model to describe the effect of light scattering by liposomes (Elsayed and Cevc 2011). The scattering background, determined by the fitting routine separately for each well, was then subtracted from the corresponding absorption spectra. By this means, we were able to compensate not only for the above-mentioned phenomena, but also for small absorption offsets caused by the instrument electronics and stray light.

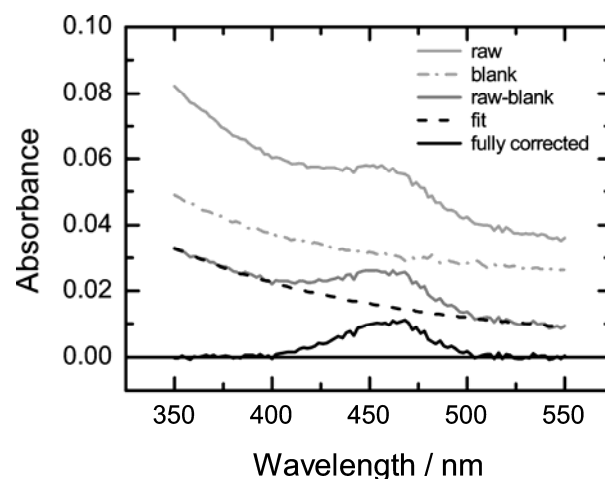

**Figure 8.** Analysis of absorption spectra. From top to bottom: 1) a raw spectrum of DCVJ in liposomes; 2) a spectrum of pure buffer solution; 3) result of subtraction of spectrum 2 from sample spectrum 1; 4) fit to the outer parts (marked bold) of the spectrum 3; 5) 'clean' absorption spectrum of DCVJ in liposomes.

#### Fluorescence spectra

Raw fluorescence spectra of our samples (Fig. 9A) are composed of the DCVJ fluorescence emission spectrum, peak of the Raman scattering of water, and background fluorescence of the 96-well plate [probably, there is also a contribution of the excitation light scattered on liposomes and leaking into the detection channel]. Surprisingly, the background fluorescence of the plate was found to depend on the temperature and showing a progressive increase at its longer wavelength tail upon heating. Furthermore, this effect was systematically stronger at lower rows of the multi-well plate, but reproducible within each of the rows. In order to remove the artefacts from the fluorescence spectra, one well in each row was filled with the pure buffer solution and was used for measuring the blank spectrum. The blank fluorescence emission spectrum (Fig. 9C) was subtracted from the sample spectra (Fig. 9B) to remove the effect of the Raman scattering and background fluorescence of the multi-well plate itself. Knowing that the DCVJ fluorescence emission spectrum in our case goes down to zero at around 640 nm, the constant offset was removed by subtracting the mean signal in the spectral range of 640-650 nm from the spectrum thus resulting in the 'clean' fluorescence spectrum of DCVJ in membranes (Figure 9D).

The method is very robust and provides highly reproducible measurement of artefact-free fluorescence spectra under these challenging experimental conditions.

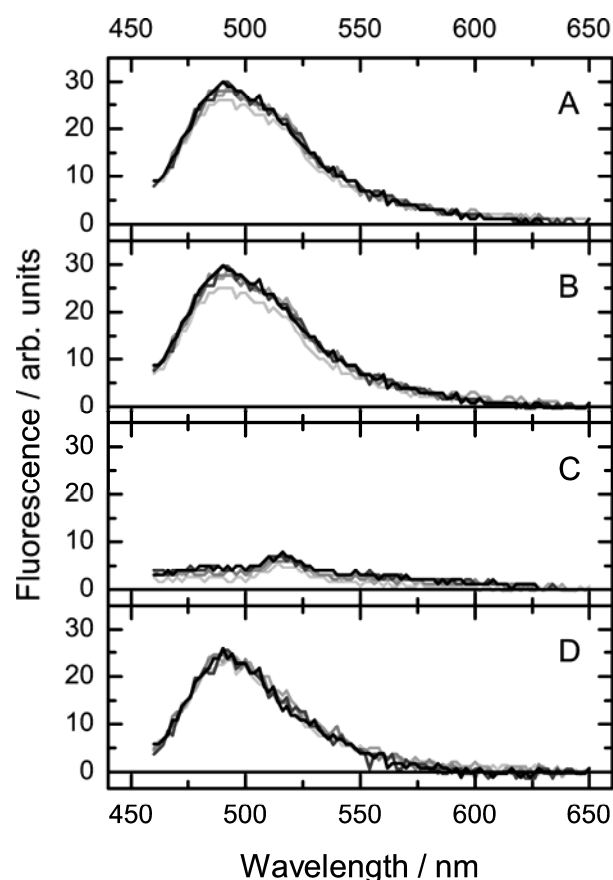

**Figure 9.** Correction of fluorescence spectra. The figure shows spectra collected from samples located on five different rows of the multi-well plate (each shade of grey corresponds to a different row). (A) raw fluorescence

spectra, (B) fluorescence spectra shifted by constant offset, (C) fluorescence background containing the Raman peak of water recorded from the blank sample; (D) 'pure' fluorescence spectrum of DCVJ produced by subtracting the spectrum displayed in panel (C) from that in panel (B).

#### Estimation of membrane viscosity and its Arrhenius activation energy

The method we describe here is based on the dependence of the fluorescence quantum yield of the DCVJ dye on the microviscosity of its immediate environment (Loutfy and Arnold 1982). As the experimental determination of the absolute fluorescence quantum yield is very challenging, especially under our experimental conditions, we resort instead to the use of a proxy quantity defined as a ratio of the fluorescence emission intensity and absorbance of membrane-bound DCVJ.

In order to obtain lipid viscosity estimates, we first calculated the ratio  $R = F/A$  of the quantities representing the fluorescence intensity ( $F$ ) and absorbance ( $A$ ) of membrane-bound DCVJ.

The quantity  $A$  was evaluated by integrating the artefact-free absorption spectrum over an interval of wavelengths that was centered on the fluorescence excitation wavelength and had a width corresponding to the spectral slit width in the fluorescence measurements. The quantity  $F$  was evaluated by integrating the artefact-free fluorescence emission spectrum over the whole spectral range of fluorescence measurements.

Results from three independent replicates (5 analytical replicates each) were grouped together, and the mean values of fluorescence intensity  $\langle F \rangle$  and absorbance  $\langle A \rangle$ , and their standard deviations  $\sigma_F$  and  $\sigma_A$  were calculated. Subsequently, fluorescence-to-absorbance ratio  $\langle R \rangle = \langle F \rangle / \langle A \rangle$  was calculated, and the corresponding standard error was estimated using the error propagation as follows:

$$\sigma_R = \langle R \rangle \left[ \left( \frac{\sigma_A}{\langle A \rangle} \right)^2 + \left( \frac{\sigma_F}{\langle F \rangle} \right)^2 \right]^{1/2}$$

Similar to what has been previously reported (Haidekker et al. 2005; Loutfy and Arnold 1982), the dependence of the fluorescence-to-absorbance ratio  $R$  of DCVJ on the viscosity of the medium was found to follow the power law (see Figure 2)

$$R = B\eta^p$$

The value of the exponent  $p = 0.53 \pm 0.01$  was determined by fitting the power law to the dependence of  $R$  on  $\eta$  using a weighted nonlinear least squares routine and was found to be in excellent agreement with the previous findings (Haidekker et al. 2005). The value of the constant prefactor  $B$  depends on the particular instrument and measurement settings (which were kept constant in our measurements), and is therefore not reported here. Reverting this relationship allows one to obtain an estimate of the microviscosity of the DCVJ environment based on the measured value of the fluorescence-to-absorption ratio  $R$ . The uncertainties in the estimates of the microviscosity were calculated using the error propagation as follows:

$$\sigma_\eta = \frac{\eta}{p} \left[ \left( \frac{\sigma_R}{R} \right)^2 + \left( \frac{\sigma_B}{B} \right)^2 + \left( \frac{\sigma_p}{p} \right)^2 (\ln(R/B))^2 \right]^{1/2}$$

To obtain the Arrhenius activation energies of the viscosity, the temperature dependences of the estimated viscosities of the samples were analysed using the Arrhenius law

$$\eta = C \exp(-E_a/RT)$$

where  $E_a$  is the activation energy,  $R = 8.3145 \text{ J mol}^{-1} \text{ K}^{-1}$  is the gas constant,  $T$  is the absolute temperature, and  $C$  is the numerical prefactor (irrelevant for our study). The analysis was based on a weighted nonlinear least squares routine that took into account the uncertainties in the viscosity values and provided the best estimate of the fitting parameters along with the estimates of their uncertainties.

## Acknowledgements

Authors are grateful to Marén Gnädig for her technical support and membrane isolations. This work was supported by the B CUBE of the Technische Universität Dresden, a German Federal Ministry of Education and Research (BMBF) grant (to JPS, project # 03Z22EN12), and a VW Foundation “Life” grant (to JPS, project # 93089).

**Keywords:** lipid membranes • spectroscopy • bacteria • viscosity • high-throughput screening

- [1] M. Sinensky, Homeoviscous adaptation – a homeostatic process that regulates the viscosity of membrane lipids in *Escherichia coli*, *Proc. Natl. Acad. Sci. USA* **1974**, *71*, 522–525.
- [2] H. Nakayama, K. Ohki, T. Mistsui, Y. Nozawa, Changes in thermal phase transition of various membranes during temperature acclimation in *Tetrahymena*, *Biochim. Biophys. Acta* **1984**, *769*, 311–316.
- [3] S. V. Avery, D. Lloyd, J. L. Harwood, Temperature-dependent changes in plasma-membrane lipid order and the phagocytotic activity of the amoeba *Acanthamoeba castellanii* are closely correlated, *Biochem. J.* **1995**, *312*, 811–816.
- [4] J. L. C. M. van de Vossenberg, A. J. M. Driessen, M. S. da Costa, W. N. Konings, Homeostasis of the membrane proton permeability in *Bacillus subtilis* grown at different temperatures, *Biochim. Biophys. Acta* **1999**, *1419*, 97–104.
- [5] J. Z. Kaye, J. A. Baross, Synchronous effects of temperature, hydrostatic pressure, and salinity on growth, phospholipid profiles, and protein patterns of four *Halomonas* species isolated from deep-sea hydrothermal-vent and sea surface environments, *Appl. Environ. Microbiol.* **2004**, *70*, 6220–6229.
- [6] F. Wang, X. Xiao, H.-Y. Ou, Y. Gai, F. Wang, Role and regulation of fatty acid biosynthesis in the response of *Shewanella piezotolerans* WP3 to different temperatures and pressures, *J. Bacteriol.* **2009**, *191*, 2574–2584.
- [7] O. G. Mouritsen, Physics of biological membranes, In *Physics of Living Matter* (Eds.: D. Baeriswyl, M. Droz, A. Malaspinas, P. Martinoli), *Lecture Notes in Physics*, Vol. 284, Springer, Berlin, Heidelberg, New York, **1987**, pp. 76–109.
- [8] E. P. Petrov, P. Schwille, State of the art and novel trends in fluorescence correlation spectroscopy, in *Standardization and Quality Assurance in Fluorescence Measurements II* (Ed.: U. Resch-Genger), *Springer Ser. Fluoresc.*, Vol. 6, Springer, Berlin, Heidelberg, New York, **2008**, pp. 145–197.
- [9] T. Weidemann, J. Mücksch, P. Schwille, Fluorescence fluctuation microscopy: a diversified arsenal of methods to investigate molecular dynamics inside cells, *Curr. Opin. Struct. Biol.* **2014**, *28*, 69–76.
- [10] M. Wachsmuth, Molecular diffusion and binding analyzed with FRAP, *Protoplasma* **2014**, *251*, 373–382.
- [11] T. Förster, G. Hoffmann, Die Viskositätsabhängigkeit der Fluoreszenzquantenausbeuten einiger Farbstoffsysteme, *Z. Phys. Chem.* **1971**, *75*, 63–76.
- [12] H. Du, C. Kim, M. G. Corradini, R. D. Ludescher, M. A. Rogers, Microviscosity of liquid oil confined in colloidal fat crystal networks, *Soft Matter* **2014**, *10*, 8652–8658.
- [13] M. A. Haidekker, T. P. Brady, D. Lichlyter, E. A. Theodorakis, Effects of solvent polarity and solvent viscosity on the fluorescent properties of molecular rotors and related probes, *Bioorg. Chem.* **2005**, *33*, 415–425.
- [14] R. O. Loutfy, B. A. Arnold, Effect of viscosity and temperature on torsional relaxation of molecular rotors, *J. Phys. Chem.* **1982**, *86*, 4205–4211.
- [15] J. A. Levitt, P. H. Chung, M. K. Kuimova, G. Yahioglu, Y. Wang, J. Qu, K. Suhling, Fluorescence anisotropy of molecular rotors, *ChemPhysChem* **2011**, *12*, 662–672.
- [16] Y. Wu, M. Stefl, A. Olżyńska, M. Hof, G. Yahioglu, P. Yip, D. R. Casey, O. Ces, J. Humpolíčková, M. K. Kuimova, Molecular rheometry: direct determination of viscosity in Lo and Ld lipid phases via fluorescence lifetime imaging, *Phys. Chem. Chem. Phys.* **2013**, *15*, 14986–14993.
- [17] R. O. Loutfy, K. Y. Law, Electrochemistry and spectroscopy of intramolecular charge-transfer complexes – para-N,N-dialkylaminobenzylidenemalononitriles, *J. Phys. Chem.* **1980**, *84*, 2803–2808.
- [18] P. G. Saffman, M. Delbrück, Brownian motion in biological membranes, *Proc. Natl. Acad. Sci. USA* **1975**, *72*, 3111–3113.
- [19] B. D. Hughes, B. A. Pailthorpe, L. R. White, The translational and rotational drag on a cylinder moving in a membrane, *J. Fluid Mech.* **1981**, *110*, 349–372.
- [20] E. P. Petrov, P. Schwille, Translational diffusion in lipid membranes beyond the Saffman-Delbrück approximation, *Biophys. J.* **2008**, *94*, L41–L43.
- [21] P. Cicuta, S. L. Keller, S. L. Veatch, Diffusion of liquid domains in lipid bilayer membranes, *J. Phys. Chem. B* **2007**, *111*, 3328–3331.
- [22] A. Filippov, G. Orädd, G. Lindblom, The effect of cholesterol on the lateral diffusion of phospholipids in oriented bilayers, *Biophys. J.* **2003**, *84*, 3079–3086.
- [23] C. Herold, P. Schwille, E. P. Petrov, DNA condensation at freestanding cationic lipid bilayers, *Phys. Rev. Lett.* **2010**, *104*, 148102.
- [24] W. Ding, M. Palaikostas, W. Wang, M. Orsi, Effects of lipid composition on bilayer membranes quantified by all-atom molecular dynamics, *J. Phys. Chem. B* **2015**, *119*, 15263–15274.
- [25] S. Razin, Mycoplasma membranes as models in membrane research, in *Mycoplasma Cell Membranes* (Eds.: S. Rottem, I. Kahane), *Subcell. Biochem.*, Vol. 20, Springer, Boston, MA, **1993**, pp. 1–28.
- [26] G. Lindblom, G. Orädd, L. Råfors, S. Morein, Regulation of lipid composition in *Acholeplasma laidlawii* and *Escherichia coli* membranes: NMR studies of lipid lateral diffusion at different growth temperatures, *Biochemistry* **2002**, *41*, 11512–11515.
- [27] C. D. Linden, K. L. Wright, H. M. McConnell, C. F. Fox, Lateral phase separation in membrane lipids and the mechanism of sugar transport in *Escherichia coli*, *Proc. Natl. Acad. Sci. USA* **1973**, *70*, 2271–2275.
- [28] J. H. Davis, M. Bloom, K. W. Butler, I. C. P. Smith, The temperature dependence of molecular order and the influence of cholesterol in *Acholeplasma laidlawii* membranes, *Biochim. Biophys. Acta* **1980**, *597*, 477–491.
- [29] S. Rottem, Membrane lipids of mycoplasmas, *Biochim. Biophys. Acta* **1980**, *604*, 65–90.
- [30] Y. Wang, P. Gkeka, J. E. Fuchs, K. R. Liedl, Z. Cournia, DPPC-cholesterol phase diagram using coarse-grained molecular dynamics simulations, *Biochim. Biophys. Acta* **2016**, *1858*, 2846–2857.
- [31] C. E. Kung, J. K. Reed, Microviscosity measurements of phospholipid bilayers using fluorescent dyes that undergo torsional relaxation, *Biochemistry* **1986**, *25*, 6114–6121.
- [32] J. A. Levitt, M. K. Kuimova, G. Yahioglu, P.-H. Chung, K. Suhling, D. Phillips, Membrane-bound molecular rotors measure viscosity in live cells via fluorescence lifetime imaging, *J. Phys. Chem. C* **2009**, *113*, 11634–11642.



- [33] RStudio Team (2015). RStudio: Integrated Development for R. RStudio, Inc., Boston, MA URL <http://www.rstudio.com/>.
- [34] M. M. Elsayed, G. Cevc, Turbidity spectroscopy for characterization of submicroscopic drug carriers, such as nanoparticles and lipid vesicles: size determination, *Pharm. Res.* **2011**, 28, 2204–2222.
- [35] Graphical abstract for the manuscript was made using: Inkscape, Inkscape Project, URL <https://inkscape.org>

| Membrane composition | $E_a$ , kJ/mol            | Method                                                      | Lipid system                                  | Quantity                                                    | Ref.                                      |
|----------------------|---------------------------|-------------------------------------------------------------|-----------------------------------------------|-------------------------------------------------------------|-------------------------------------------|
| DOPC                 | $54 \pm 9$<br>27<br>46.1  | fluorescence brightness<br>pfg NMR<br>fluorescence lifetime | LUVs<br>supported lipid multibilayers<br>LUVs | viscosity<br>diffusion coefficient<br>viscosity             | (this work)<br>Filippov, 2003<br>Wu, 2013 |
| POPC                 | $53 \pm 10$<br>28<br>48.6 | fluorescence brightness<br>pfg NMR<br>fluorescence lifetime | LUVs<br>supported lipid multibilayers<br>LUVs | viscosity<br>diffusion coefficient<br>viscosity coefficient | (this work)<br>Filippov, 2003<br>Wu, 2013 |
| DOPC:chol 6:4        | $63 \pm 8$<br>32          | fluorescence brightness<br>pfg NMR                          | LUVs<br>supported lipid multibilayers         | viscosity<br>diffusion coefficient                          | (this work)<br>Filippov, 2003             |
| SOPC                 | $68 \pm 8$<br>31          | fluorescence brightness<br>pfg NMR                          | LUVs<br>supported lipid multibilayers         | viscosity<br>diffusion coefficient                          | (this work)<br>Filippov, 2007             |
| DLPC                 | $52 \pm 13$               | fluorescence brightness                                     | LUVs                                          | viscosity                                                   | (this work)                               |
| DPPC:chol 1:1        | $54 \pm 11$               | fluorescence brightness                                     | LUVs                                          | viscosity                                                   | (this work)                               |
| POPC:chol 1:1        | $58 \pm 12$<br>37         | fluorescence brightness<br>pfg NMR                          | LUVs<br>supported lipid multibilayers         | viscosity<br>diffusion coefficient                          | (this work)<br>Filippov, 2003             |
